# Supplementary material
Source: PubMed Central journal article supplement (PMC9923539)
Supplement: PEDS_20160985SupplementaryData.pdf [file PEDS_20160985SupplementaryData.pdf]

## Supplemental Information

### PAETWG PARTICIPATING MEMBERS

#### PAETWG Working Group Lead

Debbie S. Gipson, MD, MS (University of Michigan School of Medicine, Ann Arbor, Michigan)

#### PAETWG Subject Matter Experts

Ronald Ariagno, MD (Stanford University School of Medicine, Stanford, California)

Meredith Atkinson, MD, MHS (Johns Hopkins University School of Medicine, Baltimore, Maryland)

Andrew Atz, MD (Medical University of South Carolina, Charleston, South Carolina)

Jacquelyn Baskin, MD (Children's Hospital Los Angeles, Los Angeles, California)

Brian Brighton, MD, MPH (Levine Children's Hospital, Charlotte, North Carolina)

Mariana Catapano, PhD (Chiesi Farmaceutici, Parma, Italy)

Alice Chen, MD (National Cancer Institute, National Institutes of Health, Rockville, Maryland)

Robert A. Cina, MD (Medical University of South Carolina, Charleston, South Carolina)

Doug Cochrane, MD, British Columbia Patient Safety & Quality Council, Vancouver, British Columbia, Canada)

Robert Colbert, MD, PhD (National Institute of Arthritis and Musculoskeletal and Skin Diseases, National Institutes of Health, Bethesda, Maryland)

Peter Cole, MD (Montefiore Medical Center Bronx, New York)

Christoph U. Correll, MD (Hofstra Northwell School of Medicine, Hempstead, New York)

Carlton Dampier, MD (Emory University School of Medicine, Atlanta, Georgia)

Diva De León-Crutchlow MD, MSCE (Children's Hospital of Philadelphia, Philadelphia, Pennsylvania)

Beth Drolet, MD (Children's Hospital of Wisconsin, Milwaukee, Wisconsin)

Madlen Gazarian, MBBS, MSc, FRACP (University of New South Wales, Sydney, New South Wales, Australia)

Stephen Guthery, MD, MS (University of Utah School of Medicine, Salt Lake City, Utah)

Anthony Hayward, MD, PhD (National Center for Advancing Translational Sciences, National Institutes of Health, Bethesda, MD)

Emily Herreshoff, CCRP (University of Michigan School of Medicine, Ann Arbor, Michigan)

Amanda Hicks, PhD (University of Arkansas for Medical Sciences, Little Rock, Arkansas)

Margo L. Hoover-Regan, MD (University of Wisconsin School of Medicine and Public Health, Madison, Wisconsin)

Cynthia Jackson, DO, FAAP (Quintiles, Denver, Colorado)

Jeffrey P. Jacobs, MD, FACS, FACC, FCCP, Johns Hopkins All Children's Heart Institute,

Baltimore, Maryland)

Charlotte Jones, MD, PhD (Nationwide Children's Hospital, Columbus, Ohio)

Mustafa Kabeer, MD (University of California, Irvine, Orange, California)

Frederick J. Kaskel, MD, PhD (Montefiore Medical Center, Bronx, New York)

Eric Kirkendall, MD, MBI, FAAP (Cincinnati Children's Hospital Medical Center, Cincinnati, Ohio)

Matthew M. Laughon, MD, MPH (University of North Carolina Health Care, Charlotte, North Carolina)

Ellen Leschek, MD (National Institute of Diabetes and Digestive and Kidney Diseases, National Institutes of Health, Bethesda, Maryland)

Tobias Loddenkemper, MD (Boston Children's Hospital, Boston, Massachusetts)

Leslie Lundahl, PhD (Wayne State University School of Medicine, Detroit, Michigan)

Carole Marcus, MBBCh (Children's Hospital of Philadelphia, Philadelphia, Pennsylvania)

Ann McMahon, MD, MS (Office of Pediatric Therapeutics, Food and Drug Administration, Silver Spring, Maryland)

Esi Morgan, MD, MSCE (Cincinnati Children's Hospital Medical Center, Cincinnati, Ohio)

Gail Pearson, MD, ScD (National Heart, Lung, and Blood Institute, National Institutes of Health, Bethesda, Maryland)

Savian Nicholas, MD (MedDRA Maintenance and Support Services Organization, McLean, Virginia)

Victoria Pemberton, RNC, MS, CCRC (National Heart, Lung, and Blood Institute, National Institutes of Health, Bethesda, Maryland)

Charmian Quigley, MD, Independent Consultant (Sydney Children's

Hospital, Sydney, New South Wales, Australia)

J. Antonio Quiros, MD (Medical University of South Carolina, Charleston, South Carolina)

Barbara Rebold, BSN, RN, MSN (ECRI Institute, Plymouth Meeting, Pennsylvania)

Bryan Rudolph, MD (Montefiore Medical Center, Bronx, New York)

Nita Seibel, MD (Cancer Treatment and Evaluation Program, National Cancer Institute, Rockville, Maryland)

George Siberry, MD, MPH (National Institute of Child Health and Human Development, National Institutes of Health, Bethesda, Maryland)

Robert Silverman, MD (Georgetown University Medical Center, Washington D.C.)

Jennifer Simpson, MD, (University of California, Irvine, Orange, California)

Aliza B. Solomon, DO (New York Presbyterian Hospital/Weill Cornell Medical College

New York, New York)

Richard Sutherland, MD (University of North Carolina School of Medicine

Charlotte, North Carolina)

Perdita Taylor-Zapata, MD (National Institute of Child Health and Human

Development, National Institutes of Health, Bethesda, Maryland)

David F. Teitel, MD (University of California, San Francisco School of Medicine, San Francisco, California)

Susan Thomas-Schendel, MD (University of Michigan School of Medicine, Ann Arbor, Michigan)

Paolo Tomasi, MD, PhD (European Medicines Agency, London, United Kingdom)

Umit Topaloglu, MD (University of Arkansas for Medical Sciences, Little Rock, Arkansas)

Howard Trachtman, MD (New York University Langone Medical Center, New York, New York)

Katerina Tsilou, MD (National Institute of Child Health and Human Development, National Institutes of Health, Bethesda, Maryland)

Mark Turner, MBChB, PhD (University of Liverpool, Liverpool, United Kingdom)

Kelly Wade, MD (Children's Hospital of Philadelphia, Philadelphia, Pennsylvania)

Daniel Wechsler, MD, PhD (Duke University Medical Center, Durham, North Carolina)

Constance E. West, MD (Cincinnati Children's Hospital Medical Center, Cincinnati, Ohio)

Albert Yan, MD (Children's Hospital of Philadelphia, Philadelphia, Pennsylvania)

Anne Zajicek, MD (National Institute of Child Health and Human Development, National Institutes of Health, Bethesda, Maryland)

Anna Zhao-Wong, MD, PhD, PMP (MedDRA Maintenance and Support Services Organization, McLean, Virginia)

Karen P. Zimmer, MD, MPH, FAAP (ECRI Institute, Plymouth Meeting, Pennsylvania)

### **NCI EVS Experts**

Margaret Haber, BA, BSN, RN, Program Manager

Theresa Quinn, BS, RN

George Chang, DO, MS

Al Garrett, MD

Brenda Gumbs Petty, MD, MPH

Liz Hahn-Dantona, PhD

A. Steen, MD
